# Supplementary material for: Nickel-responsive regulation of two novelHelicobacter pyloriNikR-targeted genes
Source: Royal Society of Chemistry journal article supplement (doi:10.1039/c4mt00210e), 2014-12-02
Supplement: c4mt00210e1.pdf [file c4mt00210e1.pdf]

ARTICLE

Supplemental Information

“Nickel-Responsive Regulation of Two Novel *Helicobacter pylori* NikR–Targeted Genes”

M.D. Jones, I. Ademi, X. Yin, Y. Gong, and D.B. Zamble

**Table S1.** Primers for plasmid construction and qPCR.

| Promoter                    | Primer name | Sequence (5'–3')             |
|-----------------------------|-------------|------------------------------|
| <b>Plasmid construction</b> |             |                              |
| HPG27_1499                  | p1499F      | CTGGGTCGACTCAGCGGAAACATAGT   |
|                             | p1499R      | GATTTCGGCCGAAGCGAGCGATTAG    |
| HPG27_866                   | p866F       | CACTCGGCCGAACGCTTGTCATTCATTC |
|                             | p866R       | CATCGTCGACTGCGTGCTTTGAAAGGG  |
| <b>Gene</b>                 | <b>qPCR</b> |                              |
| <i>ureA</i>                 | qUreAF      | ACGCTGGAGAATTGGCTAAA         |
|                             | qUreAR      | CAGCTCTCGCTTCTTCCATAATA      |
| HPG27_1499                  | q1499F      | CTTGCAATTTTGGCCAGTTTT        |
|                             | q1499R      | GCTTAGCCCTGATCTTGTGG         |
| HPG27_866                   | q866F       | CGCGGCTTTAAATGTCTCGCCTTT     |
|                             | q866R       | ATCCACACCAAACCTCCAGGCATA     |
| 16S rRNA                    | q16SF       | CAGCGTCAGTAATGTTCCAG         |
|                             | q16SR       | TAGAGTGTGGGAGAGGTAGG         |
| <i>gyr</i>                  | qgyrF       | AGCGATAGAGAGGGCATTAGA        |
|                             | qgyrR       | CTCCATGGTGGTGAGTTTGT         |
| <b>Sequencing</b>           |             |                              |
|                             | sKO866F     | GCATTCTGCGTGCTTTGAAAGG       |
|                             | sKO866R     | GGGCTTATTACGCATGAAATCCTC     |
|                             | sKO866upF   | GGCTATCAACACCAGCGATC         |
|                             | sKO866upR   | CATAAGCGCATTGGGTGAGG         |
|                             | sKO866dwnF  | GTGGTCGTGTGGAGAACTTTTC       |
|                             | sKO866dwnR  | CCCTTGATTCTGAACCGCTC         |

**Table S2. Putative *HpNikR* gene targets identified through ChIP-Seq.**

| Gene Tag <sup>a</sup> | Putative Description <sup>b</sup>                            | Sequence Tag <sup>c</sup> |
|-----------------------|--------------------------------------------------------------|---------------------------|
| HPG27_998             | 30S ribosomal protein S1                                     | 291                       |
| HPG27_210             | 3-deoxy-manno-octulosonate cytidyltransferase                | 290                       |
| HPG27_663             | HopE (outer membrane protein)                                | 283                       |
| HPG27_1285            | nicotinate-nucleotide adenylyltransferase                    | 262                       |
| HPG27_1419            | RplY (50S ribosomal protein L25)                             | 256                       |
| HPG27_1036            | UDP-glucose 4-epimerase                                      | 233                       |
| HPG27_1429            | riboflavin biosynthesis protein                              | 231                       |
| HPG27_376             | UDP-3-O-[3-hydroxymyristoyl] N-acetylglucosamine deacetylase | 226                       |
| HPG27_1518            | undecaprenylphosphate N-acetylglucosaminyl transferase       | 225                       |
| HPG27_513             | 23S rRNA methyltransferase                                   | 225                       |
| HPG27_242             | Type II DNA modification enzyme                              | 224                       |
| HPG27_452             | neuraminylactose-binding hemagglutinin                       | 223                       |
| HPG27_453             | phospho-N-acetylmuramoyl-pentapeptide-transferase            | 223                       |
| HPG27_1352            | dimethyladenosine transferase                                | 221                       |
| HPG27_768             | hypothetical protein                                         | 221                       |
| HPG27_769             | hypothetical protein                                         | 221                       |
| HPG27_160             | peptidyl-prolylcis-transisomerase C                          | 220                       |
| HPG27_22              | HopD (outer membrane protein)                                | 220                       |
| HPG27_903             | prolipoprotein diacylglycerol transferase                    | 217                       |
| HPG27_1164            | ABC transporter, ATP-binding protein                         | 213                       |
| HPG27_456             | hypothetical protein                                         | 211                       |
| HPG27_457             | sodium-and chloride-dependent transporter                    | 211                       |
| HPG27_81              | RpoD (RNA polymerase sigma factor)                           | 211                       |
| HPG27_1282            | hypothetical protein                                         | 207                       |
| HPG27_27              | hypothetical protein                                         | 206                       |
| <b>HPG27_1286*</b>    | <b>NikR (nickel responsive regulator)</b>                    | 205                       |
| <b>HPG27_1287*</b>    | <b>ExbB (biopolymer transport protein)</b>                   | 205                       |
| HPG27_1091            | 50S ribosomal protein L19                                    | 204                       |
| HPG27_1499            | iron (III) ABC transporter, periplasmic iron-binding protein | 202                       |
| HPG27_1500            | alkylhydroperoxide reductase                                 | 202                       |
| HPG27_212             | hypothetical protein                                         | 202                       |
| HPG27_1051            | pyruvate flavodoxin oxidoreductase subunit delta             | 196                       |
| HPG27_1524            | hypothetical protein                                         | 194                       |
| HPG27_631             | HorF (outer membrane protein)                                | 190                       |
| HPG27_866             | iron-regulated outer membrane protein                        | 190                       |
| HPG27_1153            | ABC-transporter, ATP-binding domain                          | 189                       |
| HPG27_507             | CagA (cytotoxin-associated protein A)                        | 189                       |
| HPG27_870             | glyceraldehyde-3-phosphate dehydrogenase                     | 189                       |
| HPG27_1425            | HopK-3 (outer membrane protein)                              | 186                       |
| HPG27_1426            | hypothetical protein                                         | 186                       |
| HPG27_1165            | undecaprenyl pyrophosphate synthase                          | 183                       |
| HPG27_288             | putative N-carbamoyl-D-amino acid amidohydrolase             | 183                       |
| HPG27_354             | hypothetical protein                                         | 183                       |
| HPG27_361             | CheY (chemotaxis protein)                                    | 180                       |
| HPG27_1229            | hypothetical protein                                         | 179                       |

| Gene Tag <sup>a</sup> | Putative Description <sup>b</sup>                                 | Sequence Tag <sup>c</sup> |
|-----------------------|-------------------------------------------------------------------|---------------------------|
| HPG27_573             | ABC transporter. ATP-binding protein                              | 179                       |
| HPG27_89              | hypothetical protein                                              | 178                       |
| <b>HPG27_1459*</b>    | <b>FecA3 (putative nickel transport protein)</b>                  | 177                       |
| HPG27_257             | guanosine pentaphosphate phosphohydrolase                         | 177                       |
| HPG27_895             | hypothetical protein                                              | 177                       |
| HPG27_134             | cytochrome c oxidase (diheme subunit)                             | 176                       |
| HPG27_751             | Tig (trigger factor)                                              | 176                       |
| HPG27_1032            | ribonucleotide-diphosphate reductase subunit beta                 | 174                       |
| <b>HPG27_1289*</b>    | <b>TonB (siderophore-mediated iron transport protein)</b>         | 174                       |
| HPG27_876             | HtpX (heat shock protein)                                         | 174                       |
| HPG27_223             | NapA (neutrophil activating protein, bacterioferritin)            | 173                       |
| HPG27_890             | alanine racemase                                                  | 173                       |
| HPG27_518             | 3-oxoacyl-(acyl carrier protein) synthase II                      | 172                       |
| HPG27_988             | GMP synthase                                                      | 172                       |
| HPG27_1414            | phosphate permease                                                | 171                       |
| HPG27_1415            | conserved hypothetical nifU-like protein                          | 171                       |
| HPG27_1120            | HopQ (outer membrane protein)                                     | 170                       |
| HPG27_1158            | F0F1 ATP synthase subunit C                                       | 170                       |
| HPG27_1398            | phosphopantetheine adenylyltransferase                            | 169                       |
| HPG27_775             | hypothetical protein                                              | 169                       |
| HPG27_1421            | hypothetical protein                                              | 168                       |
| HPG27_795             | hypothetical protein                                              | 168                       |
| HPG27_841             | FecE (iron (III) dicitrate ABC transporter)                       | 168                       |
| HPG27_1064            | FlgK (flagellar hook-associated protein)                          | 167                       |
| HPG27_1440            | hypothetical protein                                              | 166                       |
| HPG27_736             | bifunctional aconitate hydratase 2/2-methylisocitrate dehydratase | 165                       |
| <b>HPG27_1435*</b>    | <b>FrpB4 (putative nickel transport protein)</b>                  | 164                       |
| HPG27_300             | arginyl-tRNA synthetase                                           | 164                       |
| HPG27_418             | polyphosphate kinase                                              | 164                       |
| HPG27_571             | ABC transporter, permease                                         | 164                       |
| HPG27_531             | adenine phosphoribosyltransferase                                 | 163                       |
| HPG27_1522            | hypothetical protein                                              | 161                       |
| HPG27_1523            | FlgG (flagellar basal body rod protein)                           | 161                       |
| HPG27_287             | hypothetical protein                                              | 161                       |
| HPG27_1474            | putative type II methylase protein                                | 159                       |
| HPG27_65              | UreE (urease accessory protein)                                   | 158                       |
| HPG27_1155            | type II adenine specific DNA methyltransferase                    | 157                       |
| HPG27_116             | HorB (outer membrane protein)                                     | 156                       |
| HPG27_1170            | coproporphyrinogen III oxidase                                    | 155                       |
| HPG27_1171            | cytochrome c553                                                   | 155                       |
| HPG27_1313            | chemotaxis response regulator                                     | 154                       |
| HPG27_145             | hypothetical protein                                              | 154                       |
| HPG27_703             | hypothetical protein                                              | 154                       |
| HPG27_325             | single-stranded-DNA specific exonuclease                          | 152                       |
| HPG27_1199            | biotin synthesis protein                                          | 150                       |
| HPG27_1391            | branched-chain amino acid aminotransferase                        | 150                       |
| HPG27_1025            | deoxycytidine triphosphate deaminase                              | 149                       |

| Gene Tag <sup>a</sup> | Putative Description <sup>b</sup>               | Sequence Tag <sup>c</sup> |
|-----------------------|-------------------------------------------------|---------------------------|
| HPG27_1026            | biotin carboxyl carrier protein                 | 149                       |
| HPG27_1066            | type II DNA modification enzyme                 | 149                       |
| HPG27_1510            | DNAse                                           | 148                       |
| HPG27_41              | HypE (hydrogenase expression/formation protein) | 148                       |
| HPG27_975             | hypothetical protein                            | 148                       |
| HPG27_1214            | NADH dehydrogenase subunit J                    | 147                       |
| HPG27_1497            | FlgB (flagellar basal body rod protein)         | 147                       |
| HPG27_1498            | FtsW (cell division protein)                    | 147                       |
| HPG27_495             | CagM (cag pathogenicity island protein)         | 137                       |
| HPG27_190             | lipopolysaccharide 1,2-glycosyltransferase      | 26                        |
| HPG27_191             | outer membrane protein                          | 26                        |

<sup>a</sup> Known targets of direct *Hp*NikR regulation are marked with an asterisk

<sup>b</sup> As annotated in the NCBI Gene Database

<sup>c</sup> As determined by SISSR

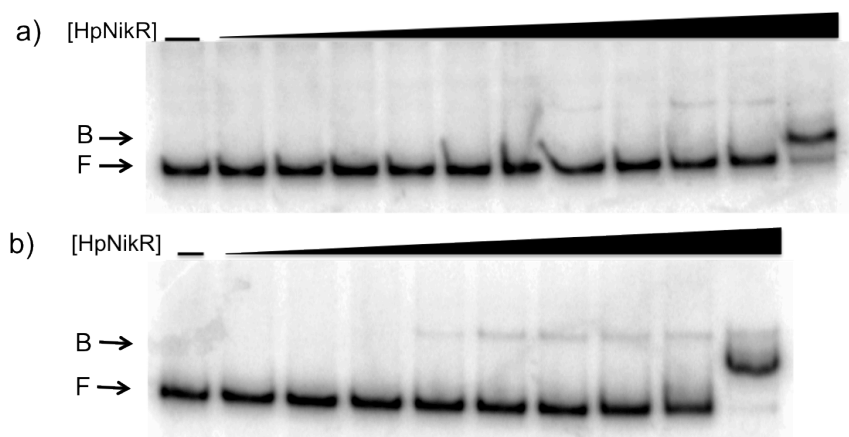

**Figure S1. DNA-binding activity of apo-*HpNikR*.**

Apo-*HpNikR* (50 nM – 100 μM) was incubated with DNA containing the HPG27\_1499 promoter sequence (a) or the HPG27\_866 sequence (b) then resolved on 6% native polyacrylamide gels with 3 mM MgSO<sub>4</sub>. Binding was observed only at the maximum *HpNikR* concentrations used.

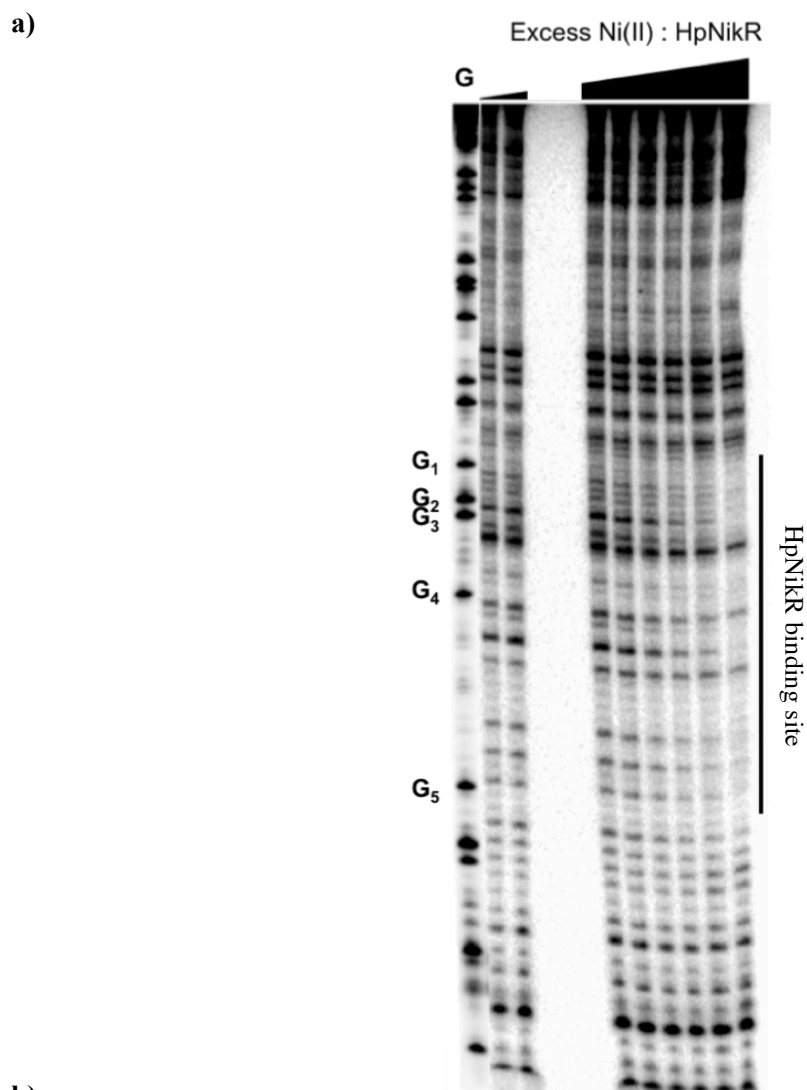

b)

5'

TCGACTCAGCGGAAACATAGTGGAGTATATTCTTAAAAAGTTAATGAAAAGATATTCCTTTTAAATTTT  
 AAGATTTTGTGAAAAAAGTTTCATTTTCACTGCTTGTATTTCCTT**G<sub>1</sub>**AATAG**G<sub>2</sub>**T**G<sub>3</sub>**TTATAATCG**G<sub>4</sub>**CTTCAT  
 AAATCATAC**G<sub>5</sub>**AAAGGAATTGTCATGCTAATCGCTCGCTTCGGCCG 3'

**Figure S2. DNA binding by *HpNikR* in excess nickel on the 1499 promoter.**

**a)** *HpNikR* (50 nM, 100 nM, 200 nM, 250 nM, 300 nM, 500 nM, 1  $\mu$ M, 5  $\mu$ M) was incubated with a  $^{32}$ P-labeled 184-bp DNA probe in the presence of 35  $\mu$ M NiCl<sub>2</sub> for 30 minutes at room temperature prior to the addition of DNase I. The reactions were resolved on an 8% denaturing polyacrylamide gel and the area of protection is indicated. Lane G was loaded with a Maxam-Gilbert G reaction. The apparent DNA-binding affinity was determined to be  $330 \pm 40$  nM with a Hill coefficient of  $2.02 \pm 0.04$ , calculated as an average of two independent experiments. The DNA strand was labeled on the 3' end with  $\alpha^{32}$ P and Klenow fragment. **b)** DNA sequence of 1499 promoter (reverse complement of sequence in Figure 3b). The binding region is underlined and the guanines within in the footprint are bolded and noted on the footprint gel.

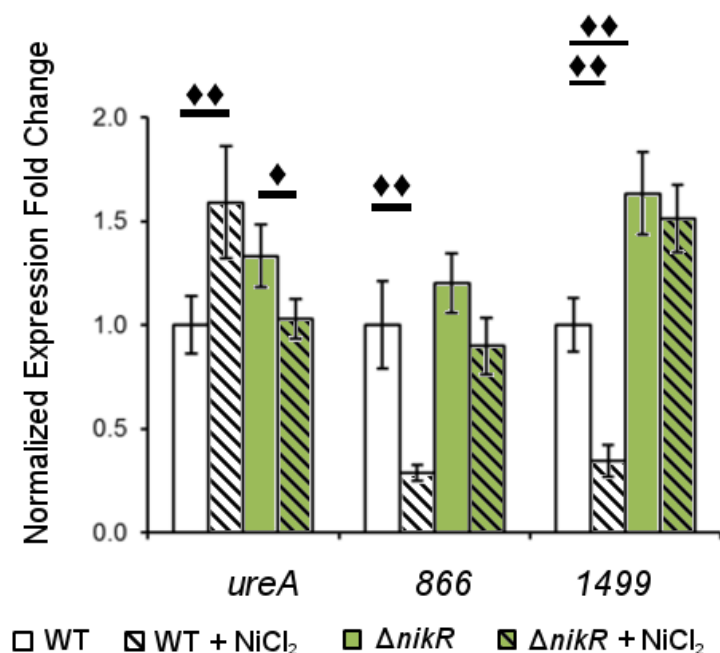

**Figure S3. Expression of *H. pylori* genes upon transient nickel exposure.**

Quantitative PCR was performed for *H. pylori* G27 and its isogenic  $\Delta nikR$  mutant grown to mid-log phase and exposed to 100  $\mu\text{M}$  NiCl<sub>2</sub> for 15 minutes. Fold expression is relative to *16S* and *gyr* expression under the same conditions and normalized to WT without nickel. Statistically significant differences between expression levels are marked with diamonds (♦ =  $P < 0.05$ , ♦♦ =  $P < 0.01$ , Student's t-test). The data represent the average of at least three independent biological and technical replicates, and the error bars indicate one standard deviation.

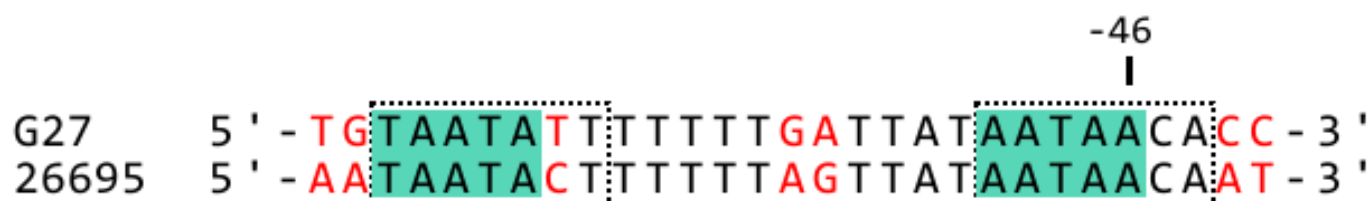

**Figure S4. Alignment of the HPG27\_866/*frpB2* promoters from *H. pylori* strains G27 and 26695.**

The *HpNikR* recognition consensus sequence proposed by Delany et al<sup>28</sup> is circled by a dashed line and the consensus sequence proposed by Stoof et al<sup>29</sup> is highlighted in blue. Both promoter sequences are the same distance upstream of the start codon.
